# Supplementary material for: Largely enhanced energy storage density of poly(vinylidene fluoride) nanocomposites based on surface hydroxylation of boron nitride nanosheets
Source: Royal Society of Chemistry journal article supplement (doi:10.1039/c8ta01294f), 2018-01-01
Supplement: c8ta01294f1.pdf [file c8ta01294f1.pdf]

## Supplementary Information

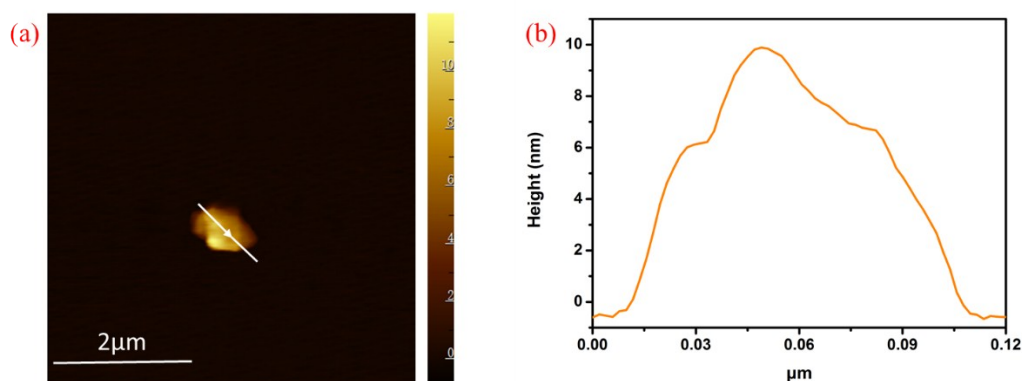

Fig. S1 (a) AFM image of the BNNs and (b) corresponding height information.

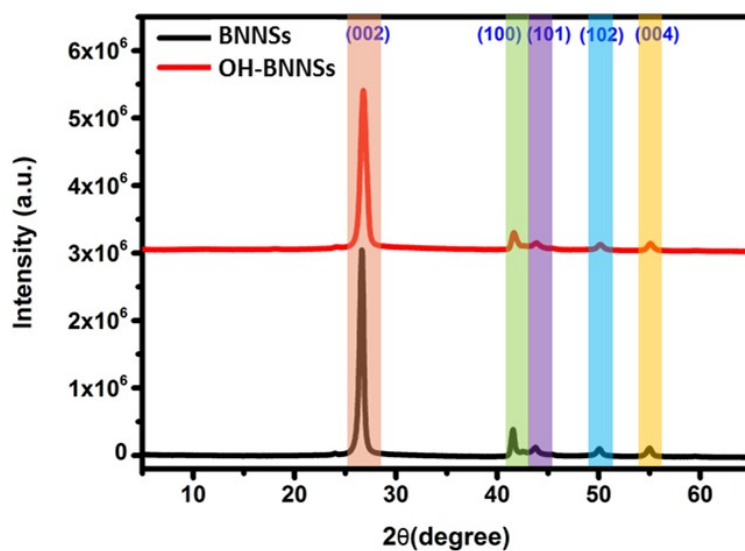

Fig. S2 The representative XRD image of BNNs and OH-BNNs. The peaks of BNNs and OH-BNNs at  $2\theta \approx 27^\circ, 42^\circ, 44^\circ, 55^\circ$  results from the diffraction of (002), (100), (101), (102) and (004) peaks of h-BN.

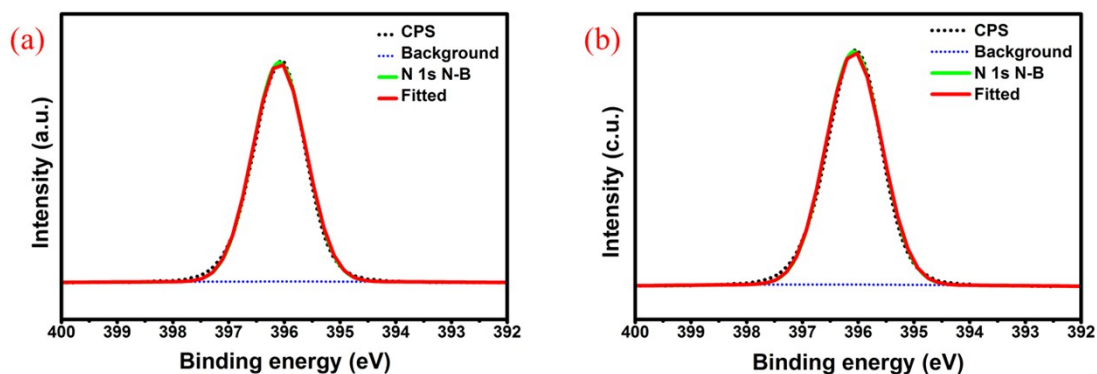

Fig. S3 N 1s spectra of (a) BNNSs and (b) OH-BNNSs, and showing that the hydroxyl groups do not graft onto N atoms.

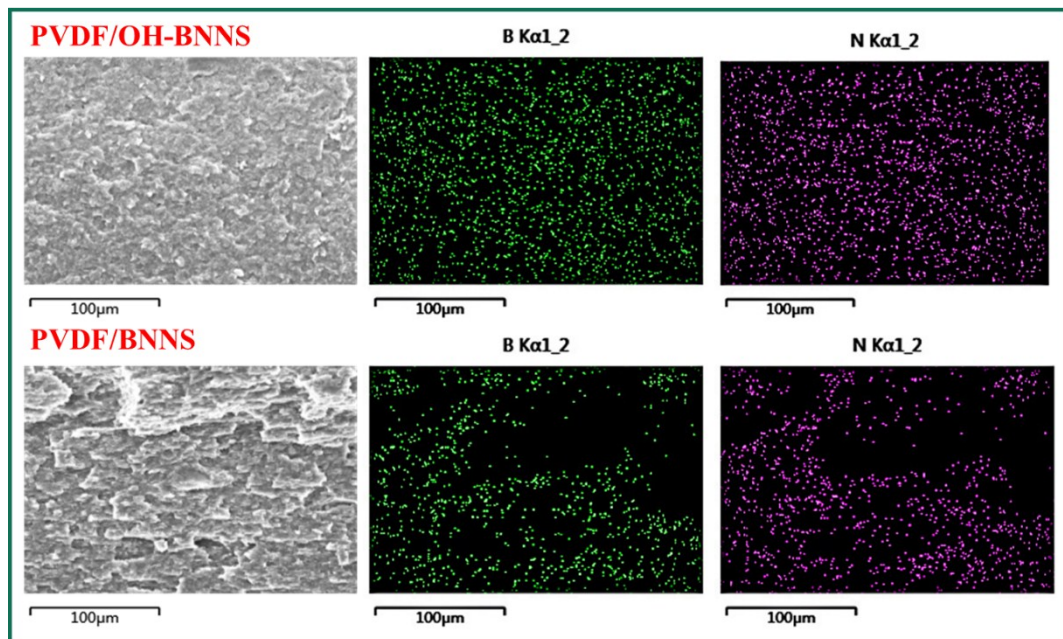

Fig. S4 STEM analysis and EDX element mapping of PVDF/BNNS and PVDF/OH-BNNS nanocomposites, respectively.

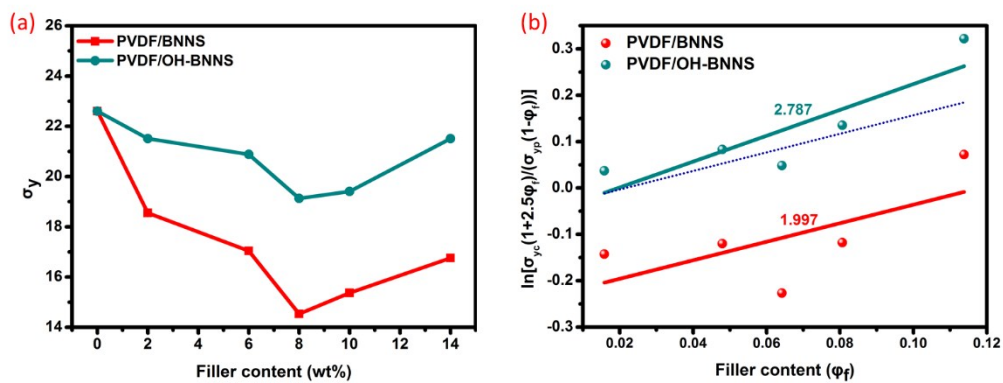

Fig. S5 (a) Yield stress and (b) interfacial interactivity parameter B of the PVDF/BNNS and PVDF/OH-BNNS nanocomposites. And lines in (b) were obtained by linear fitting in origin. The interfacial interaction can be evaluated by a semiempirical equation:

$$\sigma_{yc} = \frac{1 - \Phi_f}{1 + 2.5\Phi_f} \exp(B\Phi_f)$$

. Where  $\sigma_{yc}$  and  $\sigma_{yp}$  are yield stress of the nanocomposite and polymer matrix, respectively, while  $\Phi_f$  is the volume fraction of filler, and B is a parameter which indicates the interfacial interaction in the nanocomposites. If

$\ln[\sigma_{yc}(1 + 2.5\Phi_f)/(\sigma_{yp}(1 - \Phi_f))]$  of fraction value is plotted against  $\Phi_f$  of BNNs and OH-BNNs dispersed phase, parameter B can be calculated as a line slope. This assumes the  $\sigma_{yc}$  to be constant. And the values of interfacial interaction parameter B, evaluated from  $\sigma_y$  values are 2.787 and 1.997 for PVDF/OH-BNNs and PVDF/BNNs nanocomposites, respectively.

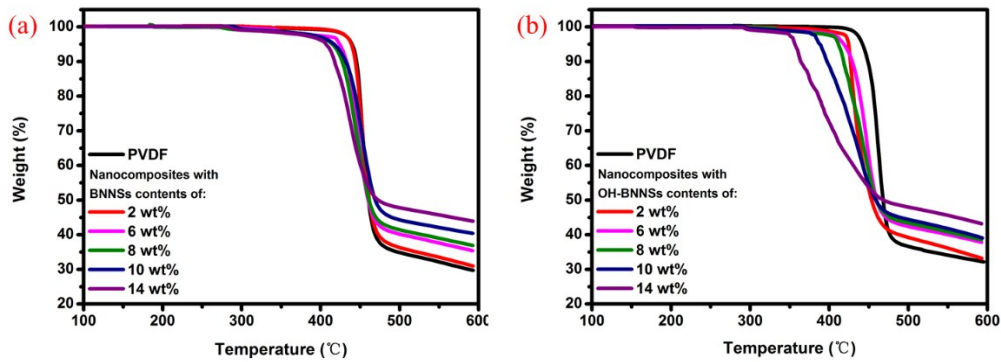

Fig. S6 TGA curves of (a) PVDF/BNNs and (b) PVDF/OH-BNNs nanocomposites.

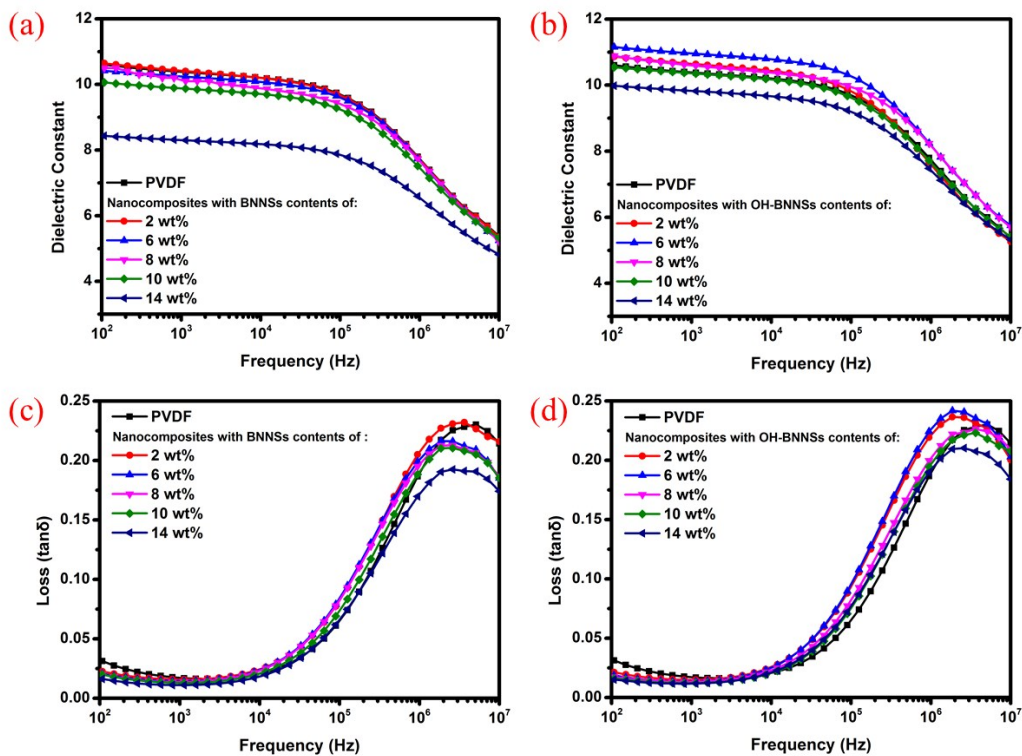

Fig. S7 Frequency dependence of the dielectric constant of (a) PVDF/BNNs and (b) PVDF/OH-BNNs nanocomposites, respectively. Frequency dependence of the dielectric loss tangent (c) PVDF/BNNs and (d) PVDF/OH-BNNs nanocomposites.

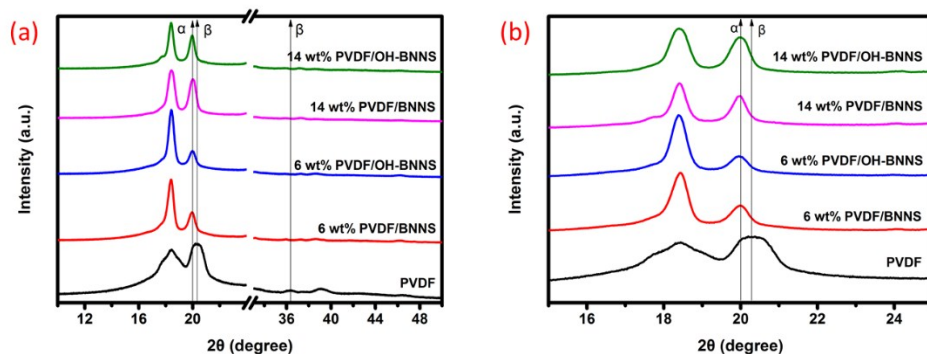

Fig. S8 (a) XRD histogram of the PVDF, 6 wt% PVDF/BNNS, 6 wt% PVDF/OH-BNNS, 14 wt% PVDF/BNNS and 14 wt% PVDF/OH-BNNS samples; (b) enlarged view of XRD histogram (15–25°) of these samples.

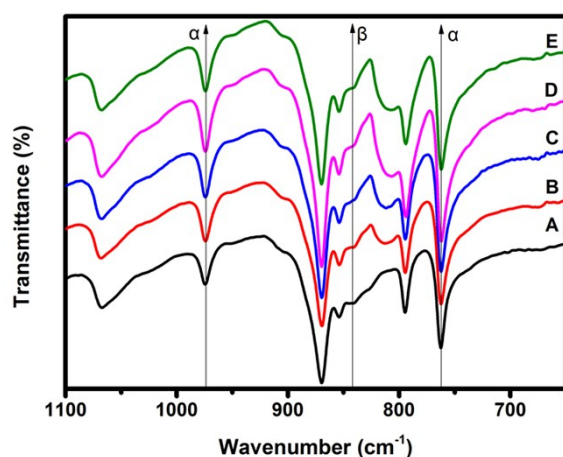

Fig. S9 The FTIR spectra of A. PVDF, B. 6 wt% PVDF/BNNS, C. 6 wt% PVDF/OH-BNNS, D. 14 wt% PVDF/BNNS and E. 14 wt% PVDF/OH-BNNS samples.

Table S1. The thermal diffusivity, density and specific heat capacity of PVDF-based nanocomposites.

| Sample      | $\alpha //$<br>(mm <sup>2</sup> /s) | $\rho$<br>(g/cm <sup>3</sup> ) | C<br>(kJ/kg K) |
|-------------|-------------------------------------|--------------------------------|----------------|
| Neat PVDF   | 1.26                                | 1.77                           | 1.2            |
| 2 wt% BNNS  | 1.967                               | 1.771                          | 1.19           |
| 6 wt% BNNS  | 2.383                               | 1.792                          | 1.171          |
| 8 wt% BNNS  | 2.464                               | 1.802                          | 1.161          |
| 10 wt% BNNS | 2.555                               | 1.813                          | 1.151          |

|                |       |       |       |
|----------------|-------|-------|-------|
| 14 wt% BNNS    | 2.881 | 1.834 | 1.131 |
| 2 wt% OH-BNNS  | 2.452 | 1.771 | 1.190 |
| 6 wt% OH-BNNS  | 2.994 | 1.792 | 1.171 |
| 8 wt% OH-BNNS  | 3.206 | 1.802 | 1.161 |
| 10 wt% OH-BNNS | 3.435 | 1.813 | 1.151 |
| 14 wt% OH-BNNS | 3.66  | 1.834 | 1.131 |

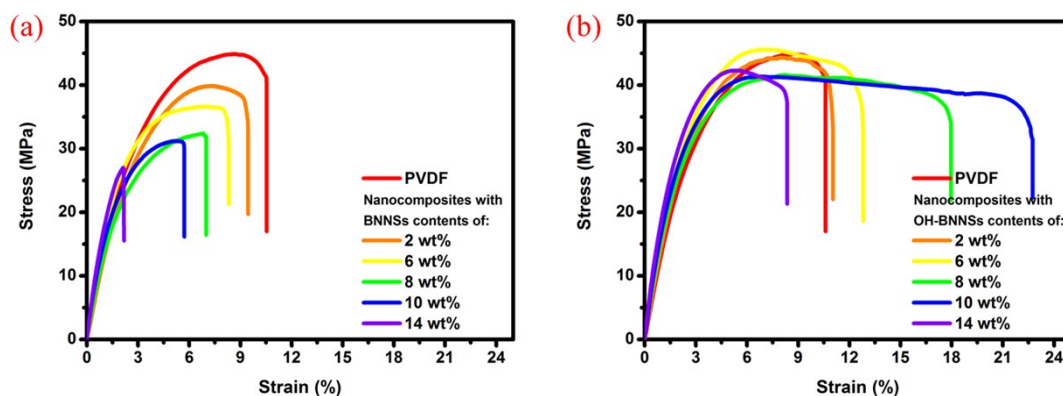

Fig. S10 The stress-strain curves of (a) PVDF/BNNS nanocomposites and (b) PVDF/OH-BNNS nanocomposites.

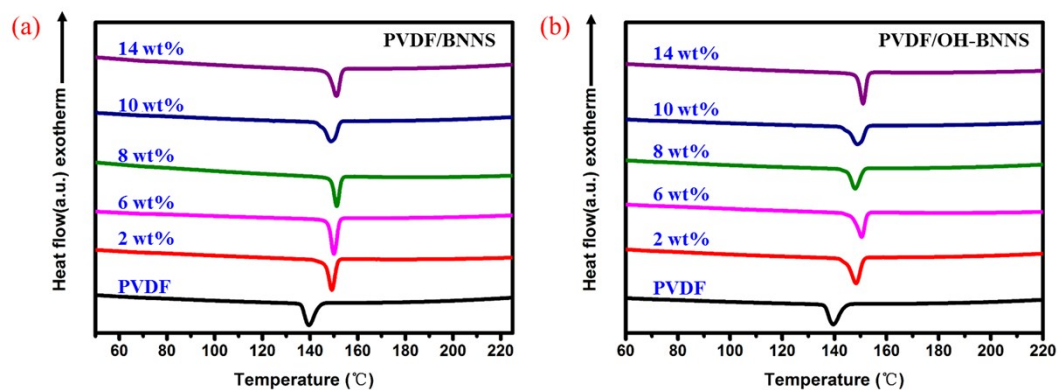

Fig. S11 DSC curves of (a) PVDF/BNNS and (b) PVDF/OH-BNNS nanocomposites during the heating cycle.

Table S2. Crystallization temperature and crystallinity of the crystalline domain of PVDF-based nanocomposites.

| Sample    | $T_c$ (°C) | Crystallinity (%) |
|-----------|------------|-------------------|
| Neat PVDF | 132.720    | 44.59             |

|                |         |       |
|----------------|---------|-------|
| 2 wt% BNNS     | 154.922 | 44.53 |
| 6 wt% BNNS     | 154.125 | 40.52 |
| 8 wt% BNNS     | 151.195 | 37.69 |
| 10 wt% BNNS    | 148.862 | 43.51 |
| 14 wt% BNNS    | 151.190 | 43.90 |
| 2 wt% OH-BNNS  | 147.808 | 43.85 |
| 6 wt% OH-BNNS  | 150.526 | 41.38 |
| 8 wt% OH-BNNS  | 148.020 | 43.46 |
| 10 wt% OH-BNNS | 150.698 | 42.66 |
| 14 wt% OH-BNNS | 151.015 | 40.95 |

---
